# Supplementary material
Source: PubMed Central journal article supplement (PMC5024349)
Supplement: NIHMS812306-supplement-FigS1.pdf [file NIHMS812306-supplement-FigS1.pdf]

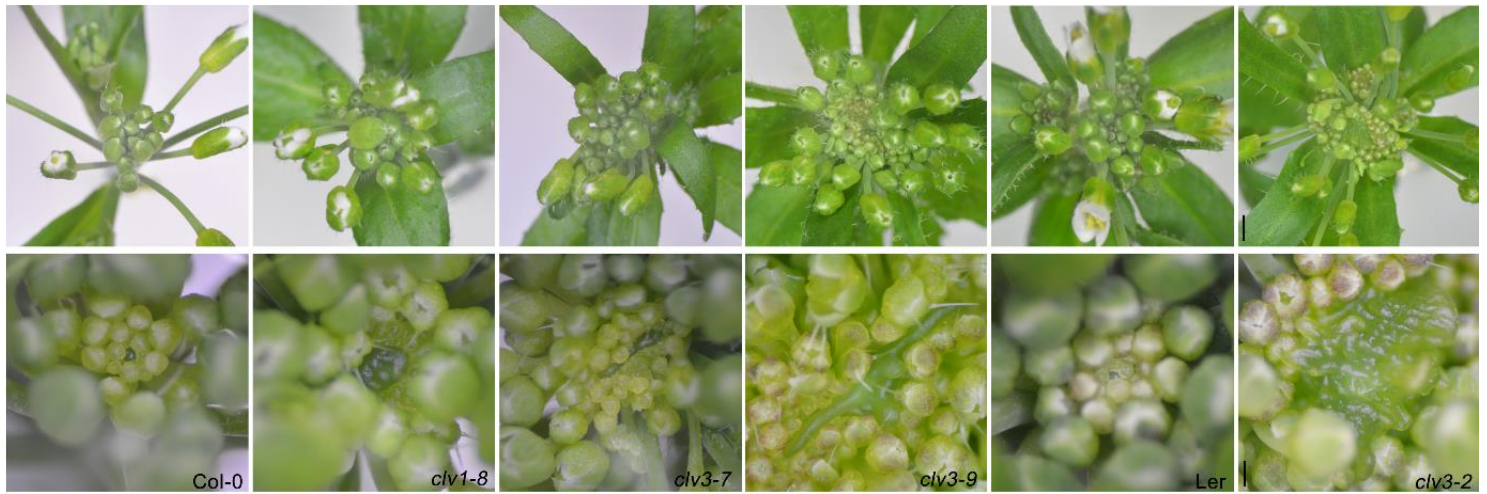

**Figure S1.** The morphology of shoot apical meristems in wild-type and *clavata* mutants, related to Figure 1.

Top panels show an overview of the shoot apex in different genetic backgrounds and a close-up of the SAMs are shown in the bottom panels. Scale bar in top panel = 2 mm, in bottom panel = 0.2 mm.
