# Supplementary material
Source: PubMed Central journal article supplement (PMC5024349)
Supplement: NIHMS812306-supplement-FigS3.pdf [file NIHMS812306-supplement-FigS3.pdf]

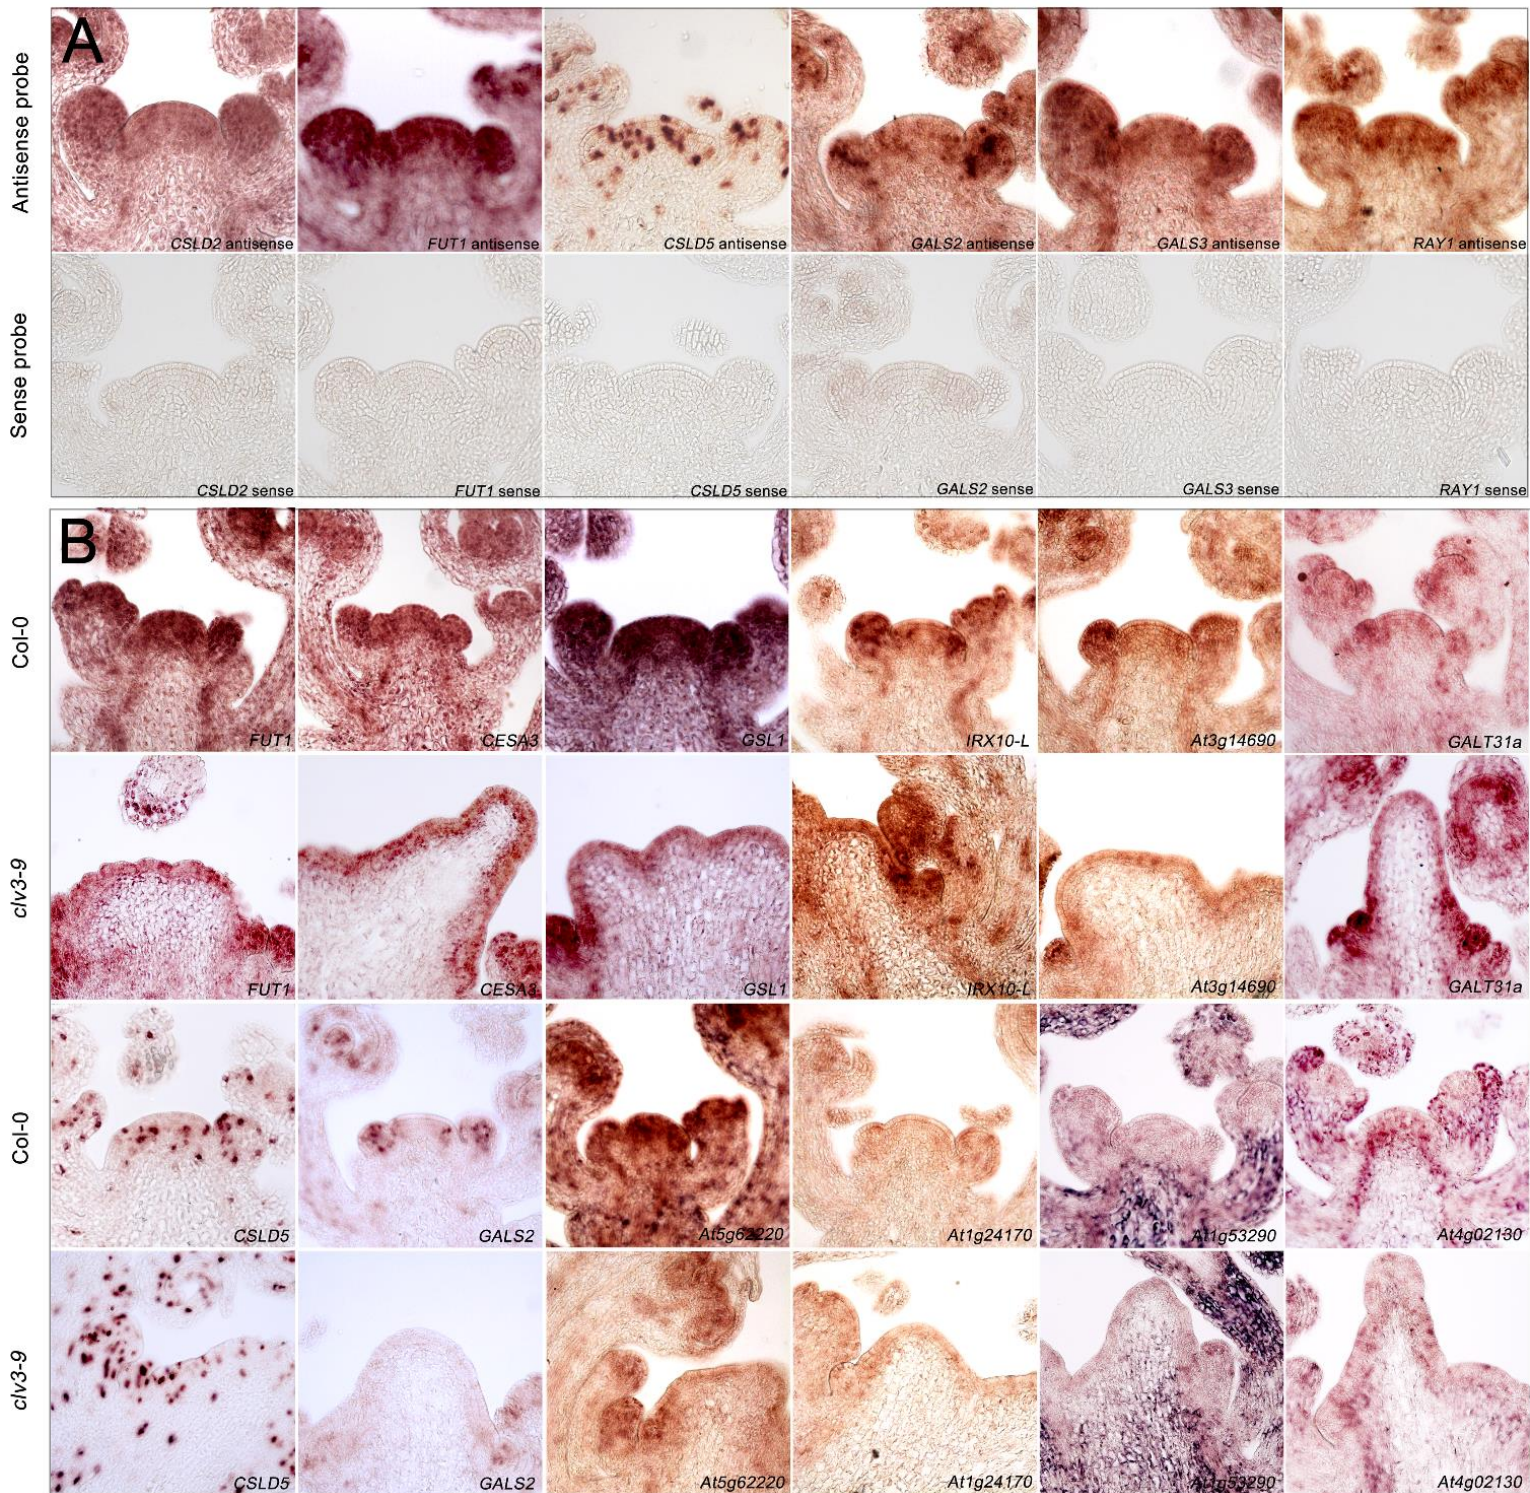

**Figure S3.** *In situ* hybridization with RNA sense probes and comparison of GT gene expression in wild-type and *clv3* mutant, related to Figure 3  
 (A) No signals could be detected using sense probes for a selection of GT genes.  
 (B) The expression patterns of GT genes were not affected by *clv3* mutation. Representative genes of each expression type as shown in Figure 3 were selected to compare their expression in wild-type (Col-0) and *clv3-9* (Col-0 background). All panels are at the same scale, scale bar = 50  $\mu$ m.
