# Supplementary material
Source: PubMed Central journal article supplement (PMC5024349)
Supplement: NIHMS812306-supplement-FigS4.pdf [file NIHMS812306-supplement-FigS4.pdf]

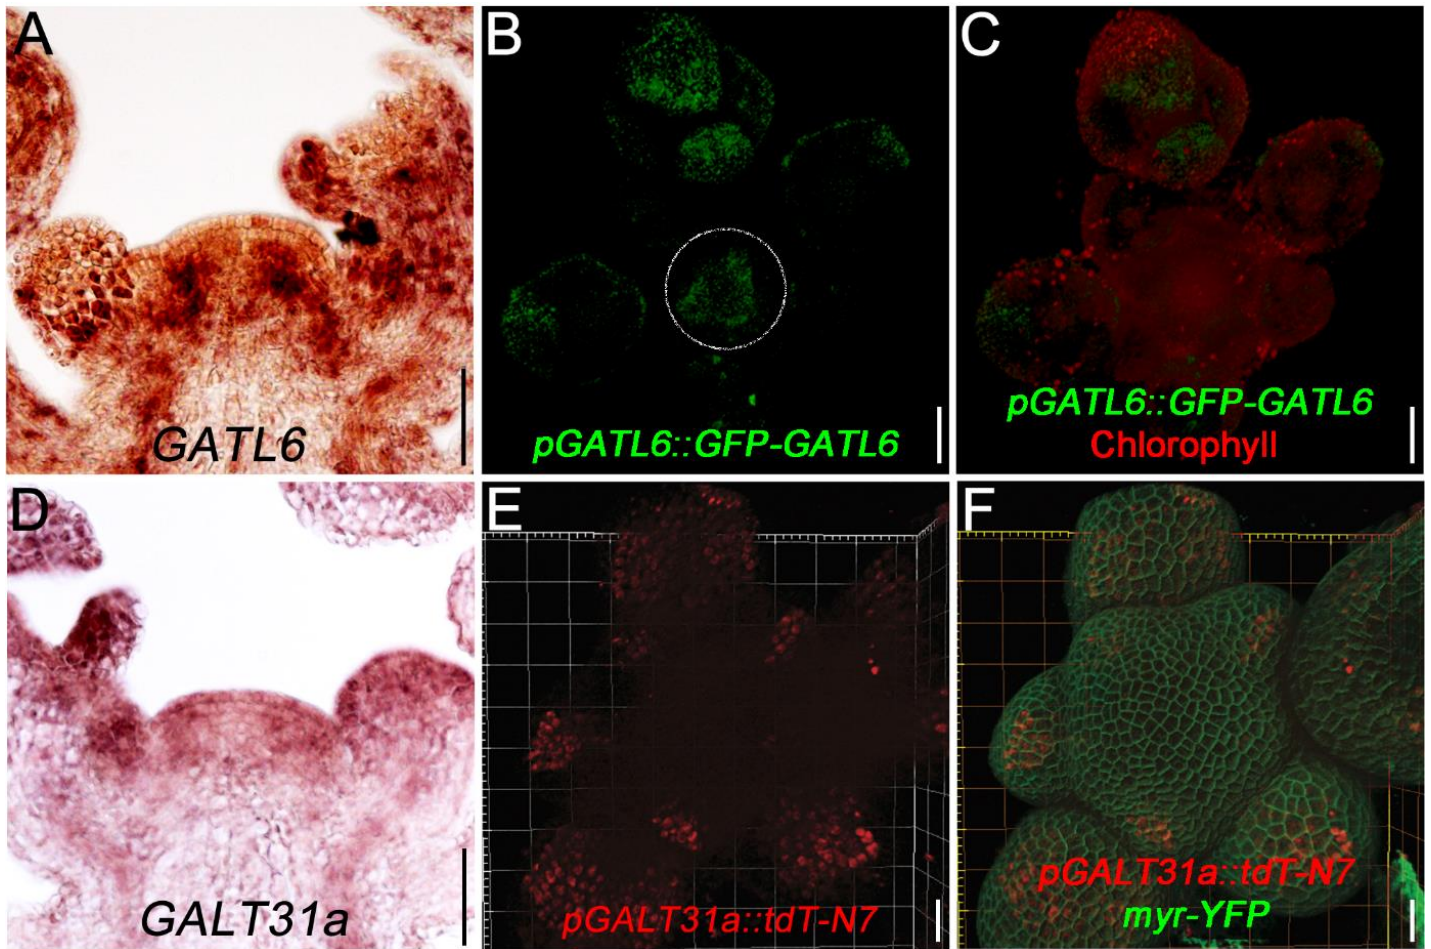

**Figure S4.** Expression patterns of the transcriptional or translational fusions of GTs in shoot apex, related to Figure 3. (A, D) *In situ* hybridization shows the expression of GTs in SAM and flower primordia. (B-C, E-F) Visualization of GT gene expression patterns via translational fusion (B, C) or transcriptional fusions (E,F) in transgenic plants. The vascular initials in (B) are marked with dissolved circle line. Scale bars = 50  $\mu$ m
