# Supplementary material
Source: PubMed Central journal article supplement (PMC5024349)
Supplement: NIHMS812306-supplement-FigS5.pdf [file NIHMS812306-supplement-FigS5.pdf]

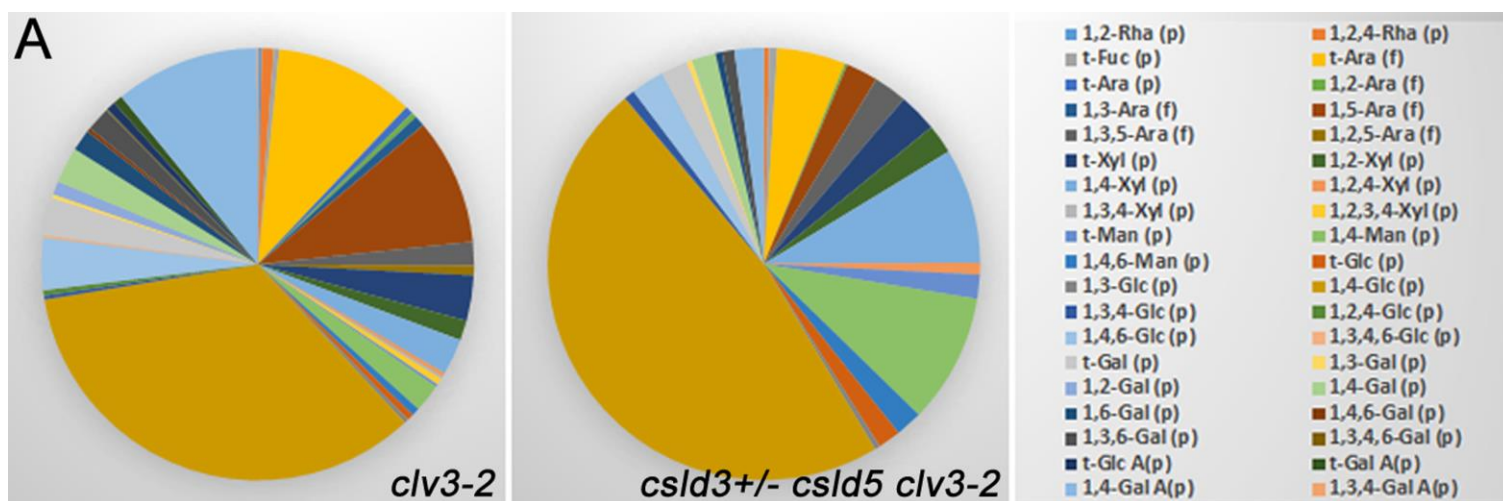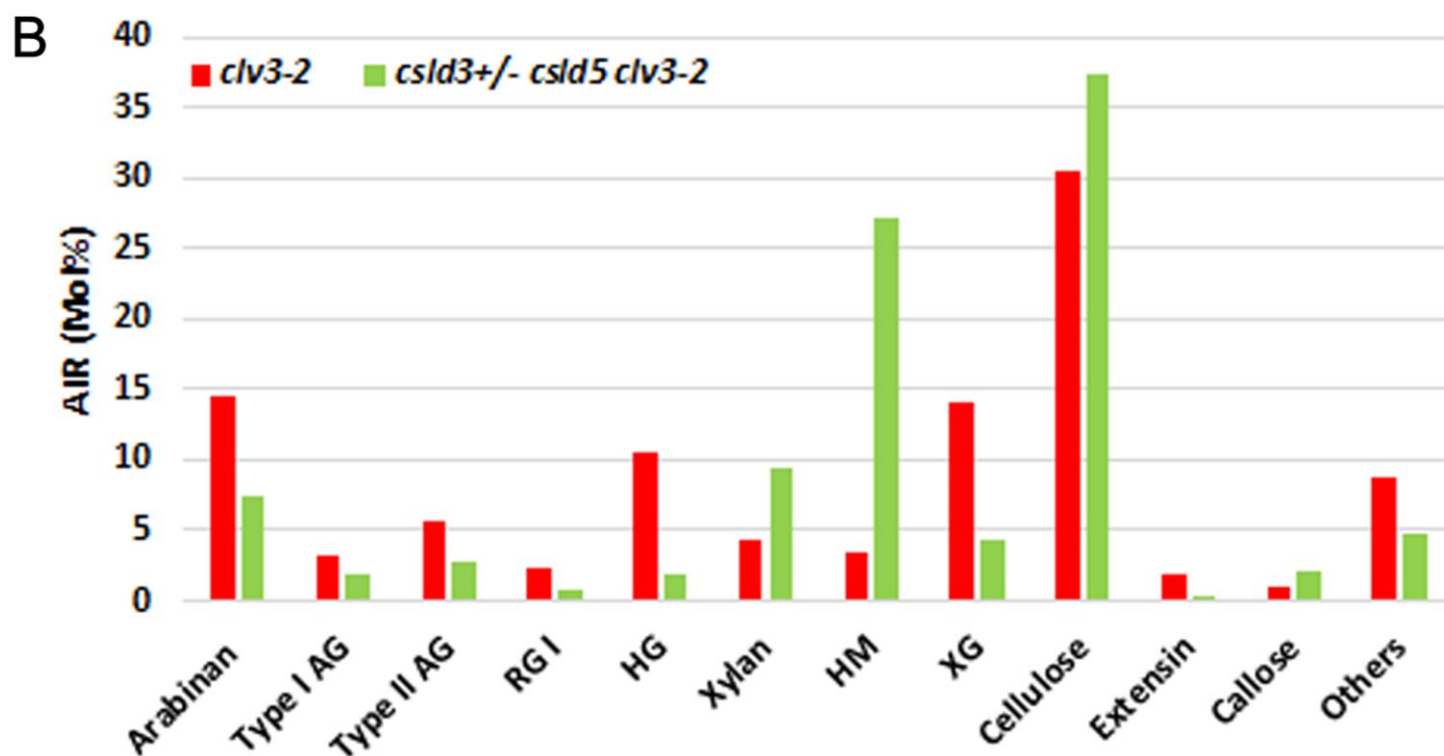

**Figure S5.** Comparison of polysaccharide composition between *clv3* and *csld clv3* SAMs. Related to Figure 4. (A) Chart showing relative quantities of individual linkages in each type of wall. Note that *csld3 csld5 clv3-2* did not give rise to an inflorescence SAM. Instead plants heterozygous for *CSLD3* (*CSLD3/csld3 csld5 clv3-2*) yielded SAMs from growth-retarded plants that were harvested for linkage analysis. (B) Bar chart showing calculated polysaccharide content in each wall type.
