# Supplementary material
Source: PubMed Central journal article supplement (PMC5024349)
Supplement: NIHMS812306-supplement-Supp_Materials_List.pdf [file NIHMS812306-supplement-Supp_Materials_List.pdf]

## **Supplementary Materials list:**

**Supplemental data** containing further experimental explanation, controls and validation and supplementary figures S1 to S4.

**Table S1.** Calculation of polysaccharide composition based on linkage analysis, related to Figure 2.

**Table S2.** Transcript data for GT family genes arranged by polysaccharide, related to Figure 3.

**Table S3.** *In situ* hybridizations showing mRNA for SAM-expressed GTs grouped according to their expression patterns.

**Table S4.** List of probes and primers.
